# Supplementary material
Source: publisher figshare collection journal article supplement (https://acs.figshare.com/ndownloader/files/5681559)
Supplement: Supplementary file 1 [file 5681559]

AUG - 2 2002

**Supplemental Information:**

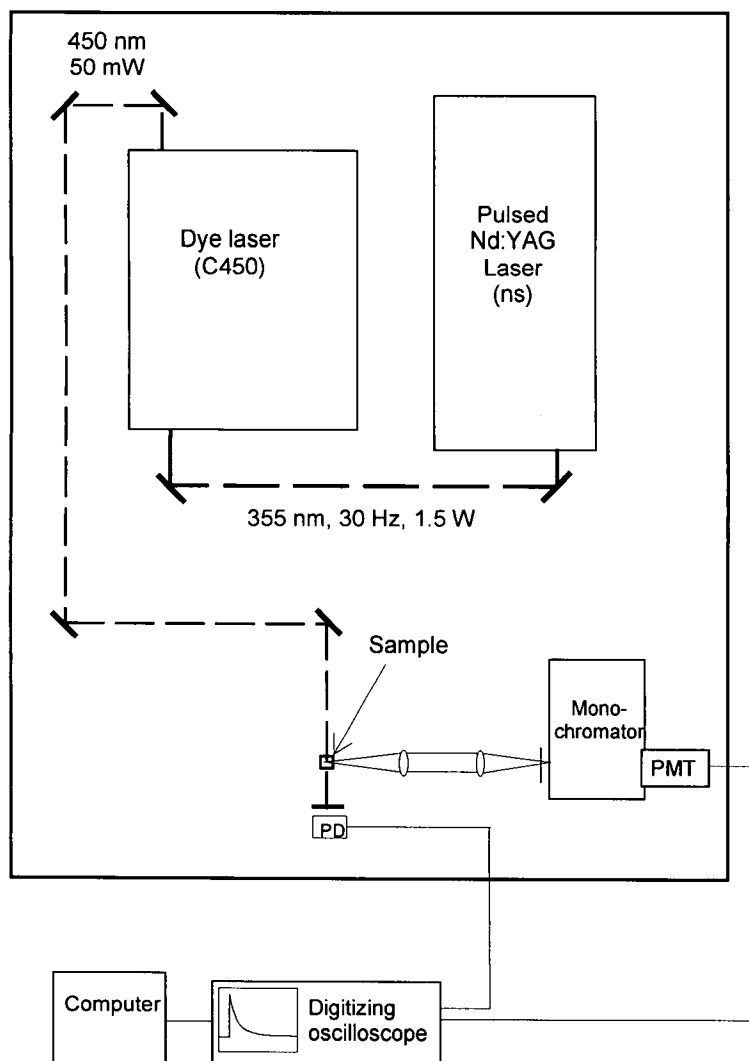

**S.I. 1.** Schematic diagram of the instrumental setup for measuring fluorescence lifetimes using a Nd:YAG-pumped dye laser for excitation.

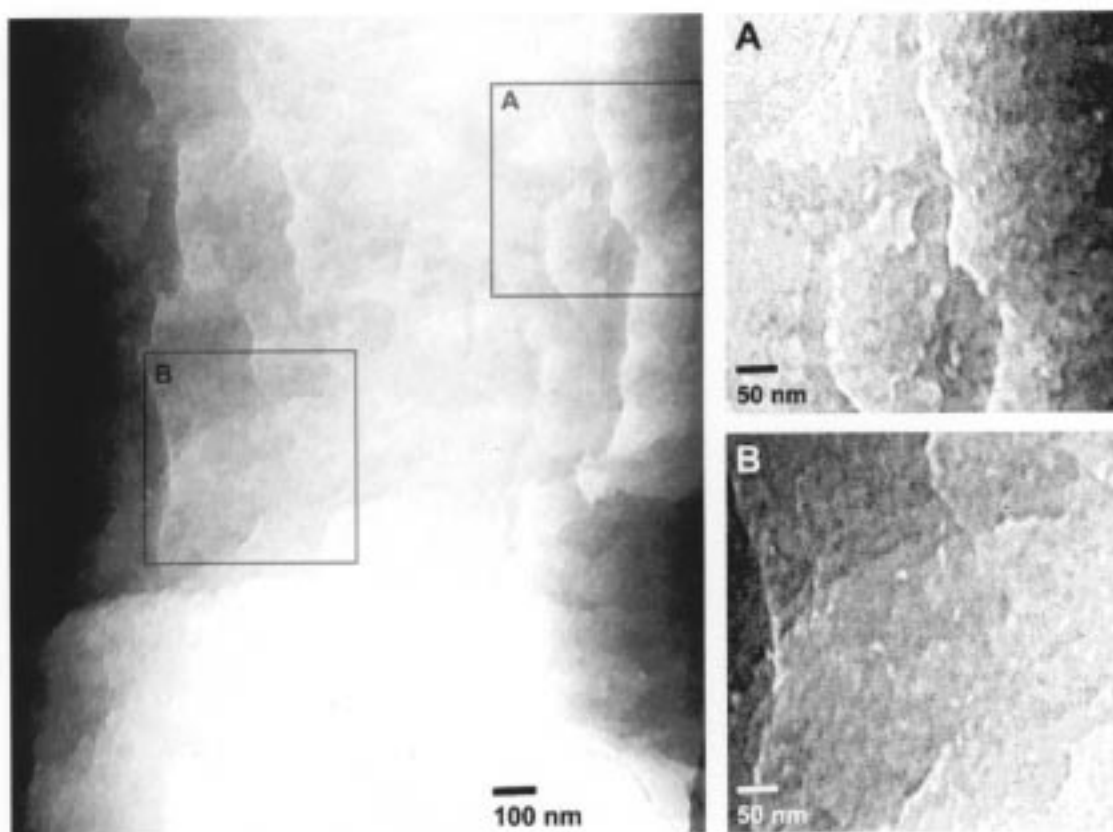

**S.I. 2.** A TEM micrograph (left) of a thin section of cross-linked polystyrene encapsulating reverse micelles containing an aqueous Rubpy solution. Areas A and B were enhanced using the “Unsharp Mask” filter (Amount = 200%, Radius = 4 pixels, Threshold = 0 levels) in Adobe Photoshop version 6.0.
